# Supplementary material for: Walk Your Talk: Real-World Adherence to Guidelines on the Use of MRI in Multiple Sclerosis
Source: MDPI journal article supplement (doi:10.3390/diagnostics11081310), 2021-07-21
Supplement: s1 [file s1]

# Real-life MR protocols for Multiple Sclerosis diagnosis and follow-up

Fields marked with \* are mandatory.

## 1 Before you start

---

This survey is not designed to assess the theoretical knowledge about recommended standardized MR protocols for Multiple Sclerosis, but rather to get a picture of what happens in clinical practice, so please answer truthfully! Also, refer only to clinical exams and not to exams acquired for research purposes.

## 2 Something about yourself

---

\* 1) How long ago did you earn your degree in radiology?

- ☐ still in training
- ☐ < 5 years ago
- ☐ between 5 and 10 years ago
- ☐ > 10 years ago

\* 2) How many exams for suspected/confirmed Multiple Sclerosis do you see in a month?

- ☐ 0-5
- ☐ 5-10
- ☐ 10-20
- ☐ >20

\* 3) Where do you see them?

- ☐ hospital
- ☐ university hospital
- ☐ other (e.g. private diagnostic clinics)

\* please specify

\* 4) In which Italian region do you work?

- ☐ Abruzzo
- ☐ Basilicata
- ☐ Calabria
- ☐ Campania
- ☐ Emilia-Romagna

- ☐ Friuli venezia Giulia
- ☐ Lazio
- ☐ Liguria
- ☐ Lombardia
- ☐ Marche
- ☐ Molise
- ☐ Piemonte
- ☐ Puglia
- ☐ Sardegna
- ☐ Sicilia
- ☐ Toscana
- ☐ Trentino-Alto Adige
- ☐ Umbria
- ☐ Valle d'Aosta
- ☐ Veneto

### 3 MRI protocol

---

In the following questions we are going to ask you information about the protocol that you use in your clinical practice

### 4 Field strength

---

\* 5) At which magnetic field strength do you usually acquire MS patients?

- ☐ <1.5T
- ☐ 1.5T
- ☐ 3T

### 5 MS diagnostic brain exam

---

The following questions specifically refer to the sequences that you usually acquire for a MS diagnostic brain exam in your clinical practice.

### 6 T1-weighted sequences - Diagnostic exam

---

\* Which of these sequences do you usually acquire for a MS diagnostic brain exam? (check all that apply)

- ☐ 2D SE T1-weighted sequence (pre-Gad)
- ☐ 3D TSE T1-weighted sequence (pre-Gad)
- ☐ 3D GrE T1-weighted sequence (pre-Gad)
- ☐ 2D SE T1-weighted sequence (post-Gad)
- ☐ 3D TSE T1-weighted sequence (post-Gad)
- ☐ 3D GrE T1-weighted sequence (post-Gad)
- ☐ other (please specify)

\* please specify

\* slice thickness for 2D SE T1-weighted sequence (pre-Gad)

- ☐ < or = 3 mm  
☐ > 3 mm

\* gap for 2D SE T1-weighted sequence (pre-Gad)

- ☐ yes  
☐ no

\* voxel size for 3D TSE T1-weighted sequence (pre-Gad)

- ☐ < 1 mm isotropic  
☐ = 1 mm isotropic  
☐ other (e.g. 0.7x0.7x1.5 mm)

\* voxel size for 3D GrE T1-weighted sequence (pre-Gad)

- ☐ < 1 mm isotropic
- ☐ = 1 mm isotropic
- ☐ other (e.g. 0.7x0.7x1.5 mm)

\* slice thickness for 2D SE T1-weighted sequence (post-Gad)

- ☐ < or = 3 mm
- ☐ > 3 mm

\* gap for 2D SE T1-weighted sequence (post-Gad)

- ☐ yes
- ☐ no

\* delay for 2D SE T1-weighted sequence (post-Gad)

- ☐ < or = 5 minutes
- ☐ > 5 minutes

\* voxel size for 3D TSE T1-weighted sequence (post-Gad)

- ☐ < 1 mm isotropic
- ☐ = 1 mm isotropic
- ☐ other (e.g. 0.7x0.7x1.5 mm)

\* delay for 3D TSE T1-weighted sequence (post-Gad)

- ☐ < or = 5 minutes
- ☐ > 5 minutes

\* voxel size for 3D GrE T1-weighted sequence (post-Gad)

- ☐ < 1 mm isotropic
- ☐ = 1 mm isotropic
- ☐ other (e.g. 0.7x0.7x1.5 mm)

\* delay for 3D GrE T1-weighted sequence (post-Gad)

- ☐ < or = 5 minutes
- ☐ > 5 minutes

## 7 T2-weighted sequences - Diagnostic exam

---

\* Which of these sequences do you usually acquire for a MS diagnostic brain exam? (check all that apply)

- ☐ 2D Dual Echo sequence
- ☐ 2D T2-weighted sequence
- ☐ 3D T2-weighted sequence

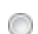

- ☐ 2D FLAIR sequence
- ☐ 3D FLAIR sequence
- ☐ other (please specify)

\* please specify

\* slice thickness for 2D Dual Echo sequence

- ☐ < or = 3 mm
- ☐ > 3 mm

\* gap for 2D Dual Echo sequence

- ☐ yes
- ☐ no

\* slice thickness for 2D T2-weighted sequence

- ☐ < or = 3 mm
- ☐ > 3 mm

\* gap for 2D T2-weighted sequence

- ☐ yes
- ☐ no

\* voxel size for 3D T2-weighted sequence

- ☐ < 1 mm isotropic
- ☐ = 1 mm isotropic
- ☐ other (e.g. 0.7x0.7x1.5 mm)

\* slice thickness for 2D FLAIR sequence

- ☐ < or = 3 mm
- ☐ > 3 mm

\* gap for 2D FLAIR sequence

- ☐ yes
- ☐ no

\* voxel size for 3D FLAIR sequence

- ☐ < 1 mm isotropic
- ☐ = 1 mm isotropic
- ☐ other (e.g. 0.7x0.7x1.5 mm)

## 8 Cortical lesion sequences - Diagnostic exam

---

\* Which of these sequences do you usually acquire for a MS diagnostic brain exam? (check all that apply)

- ☐ 2D DIR sequence
- ☐ 3D DIR sequence
- ☐ 2D PSIR sequence
- ☐ 3D PSIR sequence
- ☐ none
- ☐ other (please specify)

\* please specify

\* slice thickness for 2D DIR sequence

- ☐ < or = 3 mm
- ☐ > 3 mm

\* gap for 2D DIR sequence

- ☐ yes
- ☐ no

\* voxel size for 3D DIR sequence

- ☐ < 1 mm isotropic
- ☐ = 1 mm isotropic
- ☐ other (e.g. 0.7x0.7x1.5 mm)

\* slice thickness for 2D PSIR sequence

- ☐ < or = 3 mm
- ☐ > 3 mm

\* gap for 2D PSIR sequence

- ☐ yes
- ☐ no

\* voxel size for 3D PSIR sequence

- ☐ < 1 mm isotropic
- ☐ = 1 mm isotropic
- ☐ other (e.g. 0.7x0.7x1.5 mm)

## 9 Optic nerve sequences - Diagnostic exam

---

\* Which of these sequences do you usually acquire for a MS diagnostic brain exam? (check all that apply)

- ☐ Fat-suppressed T2-weighted (or STIR) for optic nerves
- ☐ Fat-suppressed T1-weighted, post-Gad, for optic nerves
- ☐ none

☐ other (please specify)

\* please specify

\* slice thickness for Fat-suppressed T2-weighted (or STIR) for optic nerves

- ☐ < or = 3 mm  
☐ > 3 mm

\* gap for Fat-suppressed T2-weighted (or STIR) for optic nerves

- ☐ yes  
☐ no

\* slice thickness for Fat-suppressed T1-weighted, post-Gad, for optic nerves

- ☐ < or = 3 mm  
☐ > 3 mm

\* gap for Fat-suppressed T1-weighted, post-Gad, for optic nerves

- ☐ yes  
☐ no

## 10 DWI & T2\*-weighted sequences - Diagnostic exam

---

\* Which of these sequences do you usually acquire for a MS diagnostic brain exam? (check all that apply)

- ☐ DWI  
☐ T2\*-weighted GrE sequence  
☐ 2D SWI sequence  
☐ 3D SWI sequence  
☐ none  
☐ other (please specify)

\* please specify

\* slice thickness for T2\*-weighted GrE sequence

- ☐ < or = 3 mm  
☐ > 3 mm

\* gap for T2\*-weighted GrE sequence

- ☐ yes  
☐ no

\* slice thickness for 2D SWI sequence

- ☐ < or = 3 mm  
☐ > 3 mm

\* gap for 2D SWI sequence

- ☐ yes  
☐ no

\* voxel size for 3D SWI sequence

- ☐ < 1 mm isotropic  
☐ = 1 mm isotropic  
☐ other (e.g. 0.7x0.7x1.5 mm)

## 11 MS diagnostic spine exam

---

the following questions specifically refer to the sequences that you usually acquire for a MS diagnostic spine exam in your clinical practice.

## 12 T2-weighted sequences - Diagnostic exam

---

\* Which of these sequences do you usually acquire for a diagnostic spine exam?

- ☐ TSE T2-weighted sequence  
☐ PD-weighted sequence  
☐ STIR T2-weighted sequence  
☐ other (please specify)

\* please specify

\* in which plane do you acquire the TSE T2-weighted sequence?

- ☐ sagittal  
☐ axial

\* slice thickness of sagittal TSE T2-weighted sequence

- ☐ < or = 3 mm  
☐ > 3 mm

\* gap of sagittal TSE T2-weighted sequence

- ☐ yes  
☐ no

\* in which plane do you acquire the PD-weighted sequence?

- ☐ sagittal



☐ axial

\* slice thickness of sagittal PD-weighted sequence

- ☐ < or = 3 mm  
☐ > 3 mm

\* gap of sagittal PD-weighted sequence

- ☐ yes  
☐ no

\* in which plane do you acquire the STIR T2-weighted sequence?

- ☐ sagittal  
☐ axial

\* slice thickness of sagittal STIR T2-weighted sequence

- ☐ < or = 3 mm  
☐ > 3 mm

\* gap of sagittal STIR T2-weighted sequence

- ☐ yes  
☐ no

## 13 T1-weighted and inversion recovery - Diagnostic exam

---

\* Which of these sequences do you usually acquire for a diagnostic spine exam?

- ☐ PSIR sequence  
☐ 2D TSE T1-weighted sequence (pre-Gad)  
☐ 3D GrE T1-weighted sequence (pre-Gad)  
☐ 2D TSE T1-weighted sequence (post-Gad)  
☐ 3D GrE T1-weighted sequence (post-Gad)  
☐ other (please specify)

\* please specify

\* in which plane do you acquire the PSIR sequence?

- ☐ sagittal  
☐ axial

\* slice thickness of sagittal PSIR sequence

- ☐ < or = 3 mm  
☐ > 3 mm

\* gap of sagittal PSIR sequence

- ☐ yes  
☐ no

\* in which plane do you acquire the 2D TSE T1-weighted sequence (pre-Gad)?

- ☐ sagittal  
☐ axial

\* slice thickness of sagittal 2D TSE T1-weighted sequence (pre-Gad)

- ☐ < or = 3 mm  
☐ > 3 mm

\* gap of sagittal 2D TSE T1-weighted sequence (pre-Gad)

- ☐ yes  
☐ no

\* in which plane do you acquire the 3D GrE T1-weighted sequence (pre-Gad)?

- ☐ sagittal  
☐ axial

\* slice thickness of 3D GrE T1-weighted sequence (pre-Gad)?

- ☐ < or = 3 mm  
☐ > 3 mm

\* gap of 3D GrE T1-weighted sequence (pre-Gad)?

- ☐ yes  
☐ no

\* in which plane do you acquire the 2D TSE T1-weighted sequence (post-Gad)

- ☐ sagittal  
☐ axial

\* slice thickness of sagittal 2D TSE T1-weighted sequence (post-Gad)

- ☐ < or = 3 mm  
☐ > 3 mm

\* gap of sagittal 2D TSE T1-weighted sequence (post-Gad)

- ☐ yes  
☐ no

\* delay for 2D TSE T1-weighted sequence (post-Gad)

- ☐ < or = 5 minutes  
☐ > 5 minutes

\* in which plane do you acquire the 3D GrE T1-weighted sequence (post-Gad)?

- ☐ sagittal

☐ axial

\* slice thickness of 3D GrE T1-weighted sequence (post-Gad)?

- ☐ < or = 3 mm  
☐ > 3 mm

\* gap of 3D GrE T1-weighted sequence (post-Gad)?

- ☐ yes  
☐ no

\* delay for 3D GrE T1-weighted sequence (post-Gad)

- ☐ < or = 5 minutes  
☐ > 5 minutes

## 14 MS brain follow-up exam

---

The following questions specifically refer to the sequences that you usually acquire for a MS brain follow-up exam in your clinical practice.

## 15 T1-weighted sequences - Follow up exam

---

\* Which of these sequences do you usually acquire for a MS brain follow-up exam? (check all that apply)

- ☐ 2D SE T1-weighted sequence (pre-Gad)
- ☐ 3D TSE T1-weighted sequence (pre-Gad)
- ☐ 3D GrE T1-weighted sequence (pre-Gad)
- ☐ 2D SE T1-weighted sequence (post-Gad)
- ☐ 3D TSE T1-weighted sequence (post-Gad)
- ☐ 3D GrE T1-weighted sequence (post-Gad)
- ☐ other (please specify)

\* please specify

\* slice thickness for 2D SE T1-weighted sequence (pre-Gad)

- ☐ < or = 3 mm
- ☐ > 3 mm

\* gap for 2D SE T1-weighted sequence (pre-Gad)

- ☐ yes
- ☐ no

\* voxel size for 3D TSE T1-weighted sequence (pre-Gad)

- ☐ < 1 mm isotropic
- ☐ = 1 mm isotropic
- ☐ other (e.g. 0.7x0.7x1.5 mm)

\* voxel size for 3D GrE T1-weighted sequence (pre-Gad)

- ☐ < 1 mm isotropic
- ☐ = 1 mm isotropic
- ☐ other (e.g. 0.7x0.7x1.5 mm)

\* slice thickness for 2D SE T1-weighted sequence (post-Gad)

- ☐ < or = 3 mm
- ☐ > 3 mm

\* gap for 2D SE T1-weighted sequence (post-Gad)

- ☐ yes
- ☐ no

\* delay for 2D SE T1-weighted sequence (post-Gad)

- ☐ < or = 5 minutes
- ☐ > 5 minutes

\* voxel size for 3D TSE T1-weighted sequence (post-Gad)

- ☐ < 1 mm isotropic

- ☐ = 1 mm isotropic
- ☐ other (e.g. 0.7x0.7x1.5 mm)

\* delay for 3D TSE T1-weighted sequence (post-Gad)

- ☐ < or = 5 minutes
- ☐ > 5 minutes

\* voxel size for 3D GrE T1-weighted sequence (post-Gad)

- ☐ < 1 mm isotropic
- ☐ = 1 mm isotropic
- ☐ other (e.g. 0.7x0.7x1.5 mm)

\* delay for 3D GrE T1-weighted sequence (post-Gad)

- ☐ < or = 5 minutes
- ☐ > 5 minutes

## 16 T2-weighted sequences - Follow up exam

---

\* Which of these sequences do you usually acquire for a MS brain follow-up exam? (check all that apply)

- ☐ 2D Dual Echo sequence
- ☐ 2D T2-weighted sequence
- ☐ 3D T2-weighted sequence
- ☐ 2D FLAIR sequence
- ☐ 3D FLAIR sequence
- ☐ other (please specify)

\* please specify

\* slice thickness for 2D Dual Echo sequence

- ☐ < or = 3 mm
- ☐ > 3 mm

\* gap for 2D Dual Echo sequence

- ☐ yes
- ☐ no

\* slice thickness for 2D T2-weighted sequence

- ☐ < or = 3 mm
- ☐ > 3 mm

\* gap for 2D T2-weighted sequence

- ☐ yes

☐ no

\* voxel size for 3D T2-weighted sequence

☐ < 1 mm isotropic

☐ = 1 mm isotropic

☐ other (e.g. 0.7x0.7x1.5 mm)

\* slice thickness for 2D FLAIR sequence

☐ < or = 3 mm

☐ > 3 mm

\* gap for 2D FLAIR sequence

☐ yes

☐ no

\* voxel size for 3D FLAIR sequence

☐ < 1 mm isotropic

☐ = 1 mm isotropic

☐ other (e.g. 0.7x0.7x1.5 mm)

## 17 Cortical lesion sequences - Follow up exam

---

\* Which of these sequences do you usually acquire for a MS brain follow-up exam? (check all that apply)

☐ 2D DIR sequence

☐ 3D DIR sequence

☐ 2D PSIR sequence

☐ 3D PSIR sequence

☐ none

☐ other (please specify)

\* please specify

\* slice thickness for 2D DIR sequence

☐ < or = 3 mm

☐ > 3 mm

\* gap for 2D DIR sequence

☐ yes

☐ no

\* voxel size for 3D DIR sequence

☐ < 1 mm isotropic

- ☐ = 1 mm isotropic
- ☐ other (e.g. 0.7x0.7x1.5 mm)

\* slice thickness for 2D PSIR sequence

- ☐ < or = 3 mm
- ☐ > 3 mm

\* gap for 2D PSIR sequence

- ☐ yes
- ☐ no

\* voxel size for 3D PSIR sequence

- ☐ < 1 mm isotropic
- ☐ = 1 mm isotropic
- ☐ other (e.g. 0.7x0.7x1.5 mm)

## 18 Optic nerve sequences - Follow up exam

---

\* Which of these sequences do you usually acquire for a MS brain follow-up exam? (check all that apply)

- ☐ Fat-suppressed T2-weighted (or STIR) for optic nerves
- ☐ Fat-suppressed T1-weighted, post-Gad, for optic nerves
- ☐ none
- ☐ other (please specify)

\* please specify

\* slice thickness for Fat-suppressed T2-weighted (or STIR) for optic nerves

- ☐ < or = 3 mm
- ☐ > 3 mm

\* gap for Fat-suppressed T2-weighted (or STIR) for optic nerves

- ☐ yes
- ☐ no

\* slice thickness for Fat-suppressed T1-weighted, post-Gad, for optic nerves

- ☐ < or = 3 mm
- ☐ > 3 mm

\* gap for Fat-suppressed T1-weighted, post-Gad, for optic nerves

- ☐ yes
- ☐ no

## 19 DWI & T2\*-weighted sequences - Follow up exam

---

\* Which of these sequences do you usually acquire for a MS brain follow-up exam? (check all that apply)

- ☐ DWI
- ☐ T2\*-weighted GrE sequence
- ☐ 2D SWI sequence
- ☐ 3D SWI sequence
- ☐ none
- ☐ other (please specify)

\* please specify

\* slice thickness for T2\*-weighted GrE sequence

- ☐ < or = 3 mm
- ☐ > 3 mm

\* gap for T2\*-weighted GrE sequence

- ☐ yes
- ☐ no

\* slice thickness for 2D SWI sequence

- ☐ < or = 3 mm
- ☐ > 3 mm

\* gap for 2D SWI sequence

- ☐ yes
- ☐ no

\* voxel size for 3D SWI sequence

- ☐ < 1 mm isotropic
- ☐ = 1 mm isotropic
- ☐ other (e.g. 0.7x0.7x1.5 mm)

## 20 MS spine follow-up exam

---

the following questions specifically refer to the sequences that you usually acquire for a MS spine follow-up exam in your clinical practice.

## 21 T2-weighted sequences - Follow up exam

---

\* Which of these sequences do you usually acquire for a spine follow-up exam?



- ☐ TSE T2-weighted sequence
- ☐ PD-weighted sequence
- ☐ STIR T2-weighted sequence
- ☐ other (please specify)

\* please specify

\* in which plane do you acquire the TSE T2-weighted sequence?

- ☐ sagittal
- ☐ axial

\* slice thickness of sagittal TSE T2-weighted sequence

- ☐ < or = 3 mm
- ☐ > 3 mm

\* gap of sagittal TSE T2-weighted sequence

- ☐ yes
- ☐ no

\* in which plane do you acquire the PD-weighted sequence?

- ☐ sagittal
- ☐ axial

\* slice thickness of sagittal PD-weighted sequence

- ☐ < or = 3 mm
- ☐ > 3 mm

\* gap of sagittal PD-weighted sequence

- ☐ yes
- ☐ no

\* in which plane do you acquire the STIR T2-weighted sequence?

- ☐ sagittal
- ☐ axial

\* slice thickness of sagittal STIR T2-weighted sequence

- ☐ < or = 3 mm
- ☐ > 3 mm

\* gap of sagittal STIR T2-weighted sequence

- ☐ yes
- ☐ no

## 22 T1-weighted and inversion recovery - Follow up exam

---

\* Which of these sequences do you usually acquire for a spine follow-up exam?

- ☐ PSIR sequence
- ☐ 2D TSE T1-weighted sequence (pre-Gad)
- ☐ 3D GrE T1-weighted sequence (pre-Gad)
- ☐ 2D TSE T1-weighted sequence (post-Gad)
- ☐ 3D GrE T1-weighted sequence (post-Gad)
- ☐ other (please specify)

\* please specify

\* in which plane do you acquire the PSIR sequence?

- ☐ sagittal
- ☐ axial

\* slice thickness of sagittal PSIR sequence

- ☐ < or = 3 mm
- ☐ > 3 mm

\* gap of sagittal PSIR sequence

- ☐ yes
- ☐ no

\* in which plane do you acquire the 2D TSE T1-weighted sequence (pre-Gad)?

- ☐ sagittal
- ☐ axial

\* slice thickness of sagittal 2D TSE T1-weighted sequence (pre-Gad)

- ☐ < or = 3 mm
- ☐ > 3 mm

\* gap of sagittal 2D TSE T1-weighted sequence (pre-Gad)

- ☐ yes
- ☐ no

\* in which plane do you acquire 3D GrE T1-weighted sequence (pre-Gad)

- ☐ sagittal
- ☐ axial

\* slice thickness of 3D GrE T1-weighted sequence (pre-Gad)

- ☐ < or = 3 mm
- ☐ > 3 mm

\* gap of 3D GrE T1-weighted sequence (pre-Gad)

- ☐ yes
- ☐ no

\* in which plane do you acquire the 2D TSE T1-weighted sequence (post-Gad)

☐ sagittal

☐ axial

\* slice thickness of sagittal 2D TSE T1-weighted sequence (post-Gad)

☒ < or = 3 mm

☐ > 3 mm

\* gap of sagittal 2D TSE T1-weighted sequence (post-Gad)

- ☐ yes  
☐ no

\* delay for 2D TSE T1-weighted sequence (post-Gad)

- ☐ < or = 5 minutes  
☐ > 5 minutes

\* in which plane do you acquire 3D GrE T1-weighted sequence (post-Gad)

- ☐ sagittal  
☐ axial

\* slice thickness of 3D GrE T1-weighted sequence (post-Gad)

- ☐ < or = 3 mm  
☐ > 3 mm

\* gap of 3D GrE T1-weighted sequence (post-Gad)

- ☐ yes  
☐ no

\* delay for 3D GrE T1-weighted sequence (post-Gad)

- ☐ < or = 5 minutes  
☐ > 5 minutes

## 23 Report

---

\* Do you use a structured or descriptive report?

- ☐ structured  
☐ descriptive

\* Which of these information are included in your baseline report? (check all that apply)

- ☐ anatomical area covered  
☐ field strength  
☐ slice thickness  
☐ type and dose of contrast agent used  
☐ type of sequences performed  
☐ lesion number  
☐ lesion size and or shape  
☐ lesion location  
☐ Gad enhancing lesions  
☐ atrophy (qualitative assessment)  
☐ cortical lesions  
☐ black holes  
☐ involvement of the optic nerve

\* for lesion number

- ☐ absolute number
- ☐ range (e.g. <10, between 10 and 20, >20)

\* for lesion location

- ☐ all locations
- ☐ typical location according to diagnostic criteria

\* Which of these findings/features are included in your follow-up report? (check all that apply)

- ☐ anatomical area covered
- ☐ field strength
- ☐ slice thickness
- ☐ type and dose of contrast agent used
- ☐ type of sequences performed
- ☐ lesion number
- ☐ for previously described lesions: lesion size and/or shape
- ☐ for previously described lesions: lesion location
- ☐ Gad enhancing lesions
- ☐ new T2-weighted lesions
- ☐ enlarging T2-weighted lesions
- ☐ atrophy (qualitative assessment)
- ☐ cortical lesions
- ☐ black holes
- ☐ involvement of the optic nerve

\* for previously described lesions: lesion number

- ☐ absolute number
- ☐ range (e.g. <10, between 10 and 20, >20)

\* for previously described lesions: lesion location

- ☐ all locations
- ☐ typical location according to diagnostic criteria

\* In your conclusion (radiological interpretation) do you formally refer to the 2017 revisions of the McDonald criteria?

- ☐ yes
- ☐ no

## 24 Practicalities

---

\* On average, how long does it take to write a full report for a MS diagnostic exam?

- ☐ less than 15 minutes
- ☐ between 15 and 30 minutes
- ☐ more than 30 minutes

\* On average, how long does it take to write a full report for a MS follow-up exam?

- ☐ less than 15 minutes
- ☐ between 15 and 30 minutes
- ☐ more than 30 minutes

\* At your Institution, which type of contrast agent do you usually administer to MS patients?

- ☐ macrocyclic only
- ☐ linear only
- ☐ either macrocyclic or linear

## 25 The future

---

\* Among the following pathophysiology-based MR markers, which one do you think it is ready for implementation in clinical practice? (check all that apply)

- ☐ central vein sign
- ☐ subpial demyelination
- ☐ smoldering/slowly expanding lesion
- ☐ quantitative evaluation of brain atrophy
- ☐ quantitative evaluation of spine atrophy
- ☐ none

\* why? (check all that apply)

- ☐ technical issues related to sequence availability
- ☐ acquisition time constraints
- ☐ reporting time constraints
- ☐ lack of specific training for identification of the proposed markers
- ☐ none of the proposed marker is a good expression of disease pathophysiology

## 26 Additional comments

---

Please use this space to add any comments to topics that have not been included, or have been only partly covered, in this survey
